# Supplementary material
Source: PubMed Central journal article supplement (PMC6306885)
Supplement: ba019661-suppl1.pdf [file ba019661-suppl1.pdf]

Supplemental Figures/Tables:

Figure S1: Mean ruxolitinib concentration profile for 18 evaluable patients during single agent ruxolitinib run-in and during combination ruxolitinib and decitabine phase of treatment.

Table S1: Response criteria utilized for this study. Responses were assessed based on peripheral blood counts and blast percentages, as the majority of patients did not have an aspirable bone marrow.

Table S2: Clinical characteristics of enrolled patients, including MPN history, thrombotic history, and baseline hematologic parameters.

Table S3: Baseline molecular and cytogenetic findings.

Table S4: Adverse events (Grade 3 or greater) observed during cycle 1 of therapy, regardless of attribution, divided by disease subtype (accelerated phase versus blast phase).

Á

Vaa|ÁÍ kÓe ^|ã ^Á &@eac|ã cã• Á -Á aã }• Á @ Á&@ç^ãÁ•][•}^Á} Áč á^Ě

Á

Vaa|ÁÍ kÓe ^~^} & Á -Á { { []|^ Á &&|ã \* Á ~ cãã }• Á Á•][ ] á!•Á) áÁ [ ] Ě•][ ] á!•Á

# Supplemental Figure 1

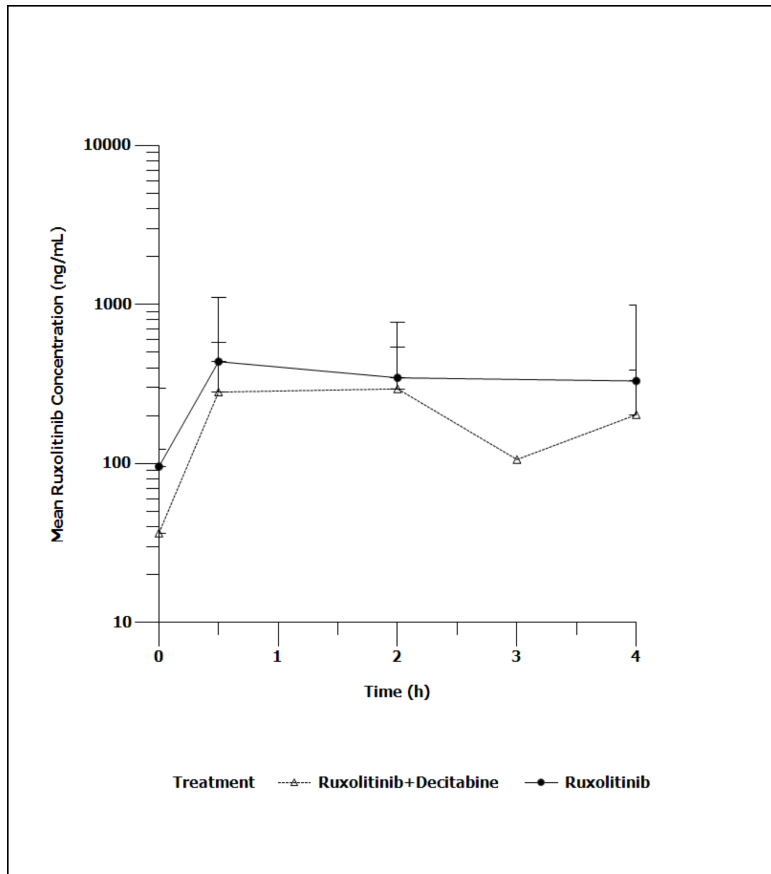

## Supplemental Table 1

| Response Designation                                   | Criteria                                                                                                                  |
|--------------------------------------------------------|---------------------------------------------------------------------------------------------------------------------------|
| Complete Response (CR)                                 | 0% peripheral blood blasts, WBC $\geq 4 \times 10^9/L$ , hemoglobin $\geq 10g/L$ , and platelets $\geq 100 \times 10^9/L$ |
| Complete Response with incomplete count recovery (CRi) | 0% peripheral blood blasts with incomplete count recovery                                                                 |
| Partial Response (PR)                                  | $\geq 50\%$ decrease in peripheral blood blasts regardless of blood counts.                                               |
| No Response (NR)                                       | None of the above                                                                                                         |

## Supplemental Table 2

|                                                             | 10mg BID<br>(N=6) | 15mg BID<br>(N=3) | 25mg BID<br>(N=6)   | 50mg BID<br>(N=6)  | Total<br>(N=21)    |
|-------------------------------------------------------------|-------------------|-------------------|---------------------|--------------------|--------------------|
| <b>Initial Diagnosis</b>                                    |                   |                   |                     |                    |                    |
| Accelerated Phase MPN                                       | 0 (0.0%)          | 0 (0.0%)          | 3 (50.0%)           | 0 (0.0%)           | 3 (14.3%)          |
| Acute Myeloid Leukemia                                      | 1 (16.7%)         | 0 (0.0%)          | 0 (0.0%)            | 0 (0.0%)           | 1 (4.8%)           |
| ET related Myelofibrosis                                    | 0 (0.0%)          | 0 (0.0%)          | 0 (0.0%)            | 2 (33.3%)          | 2 (9.5%)           |
| Essential Thrombocythemia                                   | 0 (0.0%)          | 0 (0.0%)          | 0 (0.0%)            | 1 (16.7%)          | 1 (4.8%)           |
| PV related Myelofibrosis                                    | 1 (16.7%)         | 0 (0.0%)          | 0 (0.0%)            | 1 (16.7%)          | 2 (9.5%)           |
| Polycythemia Vera                                           | 3 (50.0%)         | 2 (66.7%)         | 2 (33.3%)           | 1 (16.7%)          | 8 (38.1%)          |
| Primary Myelofibrosis                                       | 1 (16.7%)         | 1 (33.3%)         | 1 (16.7%)           | 1 (16.7%)          | 4 (19.0%)          |
| Thrombotic events last 12 months                            | 1 (16.7%)         | 0 (0.0%)          | 1 (16.7%)           | 1 (16.7%)          | 3 (14.3%)          |
| Hemorrhagic events last 12 months                           | 1 (16.7%)         | 0 (0.0%)          | 0 (0.0%)            | 2 (33.3%)          | 3 (14.3%)          |
| History of Splenectomy                                      | 1 (16.7%)         | 0 (0.0%)          | 1 (16.7%)           | 0 (0.0%)           | 2 (9.5%)           |
| White blood cell count, x10 <sup>9</sup> /L (median, range) | 14.6 (2.7-21.8)   | 4.1(3.4-4.8)      | 3.8(2.7-65.1)       | 11.7(2.3-54.1)     | 6.9(2.3-65.1)      |
| Hematocrit, % (median, range)                               | 32.7(26.2-35.4)   | 27.3(22.9-32.8)   | 22.1(21.1-28.4)     | 29.1(23.0-39.8)    | 28.3(21.1-39.8)    |
| Platelet count, x10 <sup>9</sup> /L (median, range)         | 135(55.0-556.0)   | 25(13.0-51.0)     | 191.5(10.0-458.0)   | 96.5(11.0-776.0)   | 92.0(10.0-776.0)   |
| Lactate Dehydrogenase u/L (median, range)                   | 640(247.0-1255.0) | 359(189.0-1117.0) | 278.5(195.0-1385.0) | 448.5(11.0-1058.0) | 511.0(11.0-1385.0) |

### Supplemental Table 3

| Subject | Baseline Molecular Genetic Profile                                                               | Normal Karyotype (Y/N) | Karyotype Clone 1                                                                                       | Number of Cells | Karyotype Clone 2                                                                                         | Number of Cells | Notes                                                             |
|---------|--------------------------------------------------------------------------------------------------|------------------------|---------------------------------------------------------------------------------------------------------|-----------------|-----------------------------------------------------------------------------------------------------------|-----------------|-------------------------------------------------------------------|
| 1       | JAK2p.V617F, TET2p.I1873T                                                                        |                        | 46,XX,der(1)t(1;7)(p22;q21.1)del(7)(q21.2),der(7)del(7)(q21.2)t(1;7)(p22;q21.1),del(20)(q11.2q13.1)[12] | 12              | 47,XX,der(1)t(1;7)(p22;q21.1)del(7)(q21.2),der(7)del(7)(q21.2)t(1;7)(p22;q21.1),+8,del(20)(q11.2q13.1)[3] | 3               |                                                                   |
| 2       | JAK2p.V617F                                                                                      |                        | 43,XY,-5,-7,add(16)(p12),-17,-19,+mar[2]                                                                | 2               |                                                                                                           |                 | FISH for deletion of TP53 was observed in 64% of interphase cells |
| 3       | TP53p.E343fs*2                                                                                   |                        | 46,XX,+1,der(1;18)(q10;q10)[15]                                                                         | 15              | 44,XX,-12,-17,add(20)(q12)[2]                                                                             | 2               |                                                                   |
| 4       | MPLp.R592*, SF3B1 P.K666N                                                                        | Y (46,XY)              |                                                                                                         |                 |                                                                                                           |                 |                                                                   |
| 5       | JAK2p.V617F,SRSF2p.95H, IDH1p.R132C, RUNX1p.G165V, RUNX1p.H105Y, TET2p.I1859T                    | Y (46,XY)              |                                                                                                         |                 |                                                                                                           |                 |                                                                   |
| 6       | JAK2p.V617F,TP53p.L257R, BCORp.R63K                                                              | Y (46,XX)              |                                                                                                         |                 |                                                                                                           |                 |                                                                   |
| 7       | CALRp.K374fs*48, RUNX1p.F163V,U2AF1p.Q157P,MPLp.H624D                                            |                        |                                                                                                         |                 |                                                                                                           |                 |                                                                   |
| 8       | JAK2p.V617F RUNX1p.Q335fs*25                                                                     |                        |                                                                                                         |                 |                                                                                                           |                 | Technically Inadequate                                            |
| 9       | JAK2V617F, DNMT3A p.C586Y                                                                        |                        | 39-40,XY,-3,-5,-7,del(10)(q22q24),add(11)(p11.2),-12,-13,-15,add(16)(p?12),-17,-18,                     |                 | add(19)(q13.1),del(20)(q?11.2q?13.1),+mar1,+mar2,inc[c p12]/46,XY                                         | 2               |                                                                   |
| 10      | JAK2p.V617F,TP53p.R248V,NOTCH1p.T1344M, FLT3p.T167A                                              | 46,XY                  |                                                                                                         |                 |                                                                                                           |                 |                                                                   |
| 11      | JAK2p.V617F, TET2p.E711*, KRASp.G13D                                                             |                        | 45,XX,-3,del(5)(q13q33),-7,add(9)(p24),-14,add(18)(p11.2),+2mar                                         | 18              | 46,XX,-3,del(5)(q13q33),-7,add(9)(p24),add(18)(p11.2),+2mar                                               | 2               |                                                                   |
| 12      | SETBP1p.G870C,U2AF1p.S34Y,CCND2p.281R, DNMT3Ap.R882C                                             | 46,XY                  |                                                                                                         | 20              |                                                                                                           |                 |                                                                   |
| 13      | KRASp.G12C,PTPN11p.A72T,IKZF1p.N159S,SU Z12p.D605A,RAD21p.M489L, ASXL1p.T848fs*19                |                        | 47,XY,+8                                                                                                | 18              | 46,XY,del(20)(q11.2q13.1)                                                                                 | 2               |                                                                   |
| 14      | MPLp.W515G, MPLp.W515S,ASXL1p.R693*,ASXL1p.E635fs*15                                             | Y (46,XY)              |                                                                                                         |                 |                                                                                                           |                 |                                                                   |
| 15      | MPLp.S505C,KMT2Dp.E5211K                                                                         |                        | 45,XX,del(5)(q31q35),del(14)(q11.2q13),-17,der(19)t(17;19)(q11.2;p13.1)t(5;17)(q31;q25)[9]              | 9               | 46,XX,t(4;14;19)(q21;q11.2;q13)[3]                                                                        | 3               |                                                                   |
| 16      | JAK2p.V617F,SRSF2p.P95A,SF3B1p.K666N,STA G2p.R614*, ASXL1p.Q748*,ASXL1p.G646fs*58,EZH2p.N263fs*8 | Y (46,XY)              |                                                                                                         |                 |                                                                                                           |                 |                                                                   |
| 17      | JAK2p.V617F,EZH2p.D664V                                                                          | Y (46,XX)              |                                                                                                         |                 |                                                                                                           |                 |                                                                   |
| 18      | JAK2p.V617F,U2AF1p.Q157P,NOTCH1p.R1598H, RUNX1p.Q335fs*255,ASXL1p.E635fs*15                      | Y (46,XY)              |                                                                                                         |                 |                                                                                                           |                 |                                                                   |
| 19      | JAK2p.V617F, CEBPAp.A167T, TP53p.P128f*42                                                        |                        | 45,XY,add(1)(p13),-13,-15,-19,add(21)(q22),+mar1,+mar2                                                  | 17              | 46,XY                                                                                                     | 3               |                                                                   |
| 20      | JAK2p.V617F,PTPN11p.G503V,RUNX1p.R201Q, EZH2p.E645fs*10                                          |                        | 45,XY,-7                                                                                                |                 |                                                                                                           |                 |                                                                   |
| 21      | JAK2p.V617F,TET2p.N1387S, TET2p.V218fs*32, NOTCH2p.L2408H                                        | Y                      |                                                                                                         | 20              | 46,idem,+mar                                                                                              | 20              |                                                                   |

**Supplemental Table 4**

|                           | Accelerated Phase (n=8) | Blast Phase (n=13) | Total (n=21) |
|---------------------------|-------------------------|--------------------|--------------|
| <b>Hematologic</b>        |                         |                    |              |
| Neutropenia               | 4 (50.0%)               | 3 (23.1%)          | 7 (33.3%)    |
| Grade 3                   | 3                       | 3                  | 6            |
| Grade 4                   | 1                       |                    | 1            |
| Febrile neutropenia       | 3 (37.5%)               | 4 (30.8%)          | 7 (33.3%)    |
| Grade 3                   | 3                       | 4                  | 7            |
| Lymphocytopenia           | 2 (25.0%)               | 2 (15.4%)          | 4 (19.0%)    |
| Grade 3                   | 2                       | 2                  | 4            |
| Thrombocytopenia          | 1 (12.5%)               | 3 (23.1%)          | 4 (19.0%)    |
| Grade 3                   | 1                       | 1                  | 2            |
| Grade 4                   |                         | 2                  | 2            |
| Anemia                    | 1 (12.5%)               | 3 (23.1%)          | 3 (14.3%)    |
| Grade 3                   | 1                       | 2                  | 3            |
| <b>Non-hematologic</b>    |                         |                    |              |
| Pneumonia                 | 2 (25.0%)               | 3 (23.1%)          | 6 (28.6%)    |
| Grade 3                   | 2                       | 4                  | 6            |
| Respiratory failure       | 1 (12.5%)               | 1 (7.7%)           | 2 (9.5%)     |
| Grade 3                   | 1                       |                    | 1            |
| Grade 4                   |                         | 1                  | 1            |
| Sepsis                    | 2 (25.0%)               | 1 (7.7%)           | 3 (14.3%)    |
| Grade 3                   |                         |                    |              |
| Grade 4                   | 2                       | 1                  | 3            |
| Squamous cell carcinoma   | 2 (25.0%)               |                    | 2 (9.5%)     |
| Grade 3                   | 2                       |                    | 2            |
| Cellulitis                |                         | 2 (15.4%)          | 2 (9.5%)     |
| Grade 3                   |                         | 2                  | 2            |
| Gastrointestinal bleeding | 1 (12.5%)               | 1 (7.7%)           | 2 (9.5%)     |
| Grade 3                   | 1                       |                    | 1            |
| Grade 4                   |                         | 1                  | 1            |
| Hypertension              | 2 (25.0%)               |                    | 2 (9.5%)     |
| Grade 3                   | 2                       |                    | 2            |

## Supplemental Table 5

| Patient response | Dose level (mg) | Genomic Alterations                                                                             | Baseline Spleen size (cm) | MPN-AP/BP |
|------------------|-----------------|-------------------------------------------------------------------------------------------------|---------------------------|-----------|
| CR-I             | 10 mg           | JAK2p.V617F, TET2p.I1873T                                                                       | 19                        | MPN-BP    |
| PR               | 10 mg           | MPLp.R592*, SF3B1 P.K666N                                                                       | 17                        | MPN-AP    |
| PR               | 15 mg           | CALRp.K374fs*48, RUNX1p.F163V,U2AF1 p.Q157P,MPLp.H624D                                          | N/A                       | MPN-BP    |
| PR               | 15 mg           | JAK2p.V617F RUNX1p.Q335fs*25                                                                    | 6                         | MPN-BP    |
| CR-I             | 25 mg           | MPLp.W515G,MPLp.W 515S,ASXL1p.R693*,ASXL1p.E635fs*15                                            | 15                        | MPN-AP    |
| CR-I             | 50 mg           | JAK2p.V617F,SRSF2p.P95A,SF3B1p.K666N,S TAG2p.R614*,ASXL1p.Q748*,ASXL1p.G646fs*58,EZH2p.N263fs*8 | 0                         | MPN-AP    |
| PR               | 50 mg           | JAK2p.V617F, EZH2p.D664V                                                                        | 0                         | MPN-AP    |
| CR-I             | 50 mg           | JAK2p.V617F, CEBPAp.A167T, TP53p.P128f*42                                                       | 0                         | MPN-BP    |
| PR               | 50 mg           | JAK2p.V617F,TET2p.N1387S,TET2p.V218fs*32,NOTCH2p.L2408H                                         | 0                         | MPN-BP    |

## Supplemental Table 6

| Mutation Type      | CR-I/PR | NR |
|--------------------|---------|----|
| Splicing Factor    | 3       | 3  |
| <i>RUNX1</i>       | 2       | 2  |
| <i>TP53</i>        | 1       | 0  |
| <i>TET2/IDH1/2</i> | 1       | 2  |
| <i>ASXL1</i>       | 2       | 2  |
| ≤ 3 mutations      | 5       | 2  |
| ≥ 3 mutations      | 4       | 6  |
